# Supplementary material
Source: Springer Nature journal article supplement (https://www.springermedizin.de/resource/supplementary/12968_2013_3359_MOESM5_ESM.pdf/9583500)

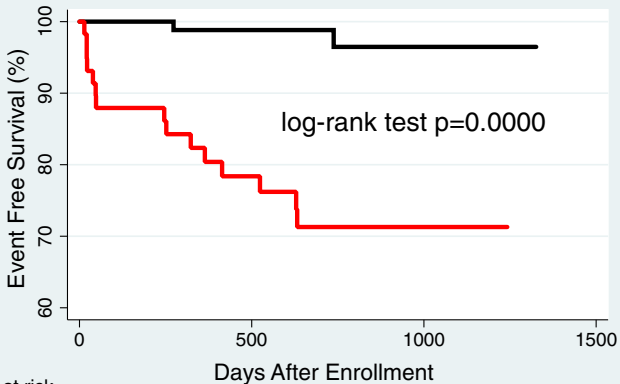

| Number at risk   |    |    |    |   |  |
|------------------|----|----|----|---|--|
| No Abnormalities | 91 | 71 | 14 | 0 |  |
| Abnormalities    | 58 | 37 | 7  | 0 |  |

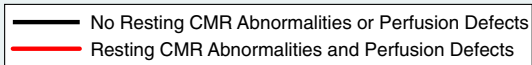

Supplement: MOESM5 [file 9583500]
